# Supplementary material for: In Situ Carbon-Confined MoSe2 Catalyst with Heterojunction for Highly Selective CO2 Hydrogenation to Methanol
Source: MDPI journal article supplement (doi:10.3390/molecules29102186), 2024-05-08
Supplement: s1 [file s1]

# In Situ Carbon-Confined MoSe<sub>2</sub> Catalyst with Heterojunction for Highly Selective CO<sub>2</sub> Hydrogenation to Methanol

Yanyang Sun, Linfei Xiao \* and Wei Wu \*

National Center for International Research on Catalytic Technology, School of Chemistry and Material Sciences, Heilongjiang University, Harbin 150080, China; sunyanyang99@163.com

\* Correspondence: xiaolf@hlju.edu.cn (L.X.); wuwei@hlju.edu.cn (W.W.)

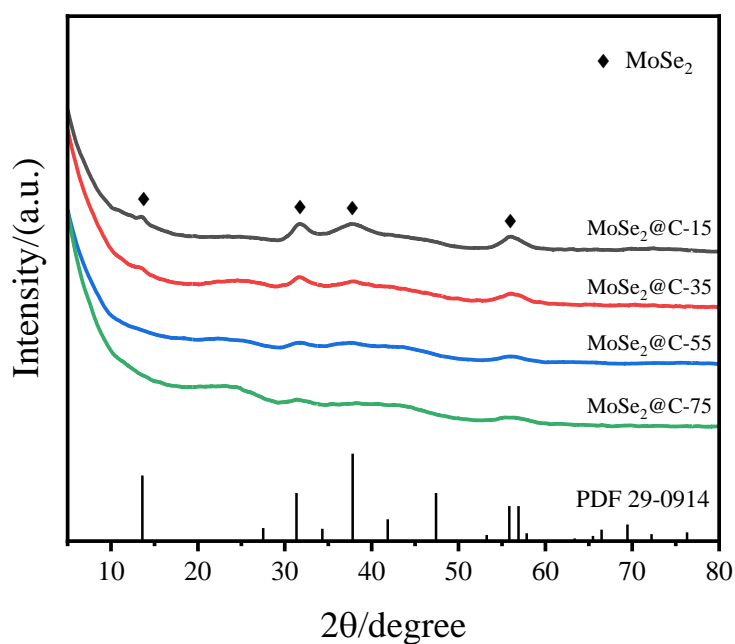

**Figure S1.** XRD patterns of MoSe<sub>2</sub>@C-x catalysts prepared with different C/Mo ratios.

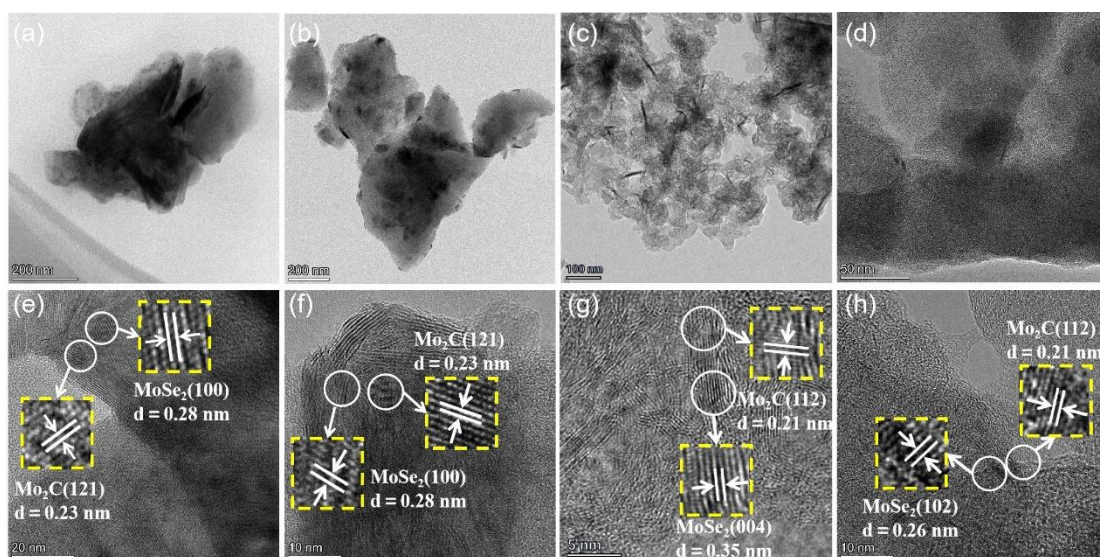

**Figure S2.** TEM and HRTEM images of MoSe<sub>2</sub>@C-x catalysts prepared with

different C/Mo ratios: (a, e) MoSe<sub>2</sub>@C-15; (b, f) MoSe<sub>2</sub>@C-35; (c, g) MoSe<sub>2</sub>@C-55; (d, h) MoSe<sub>2</sub>@C-75.

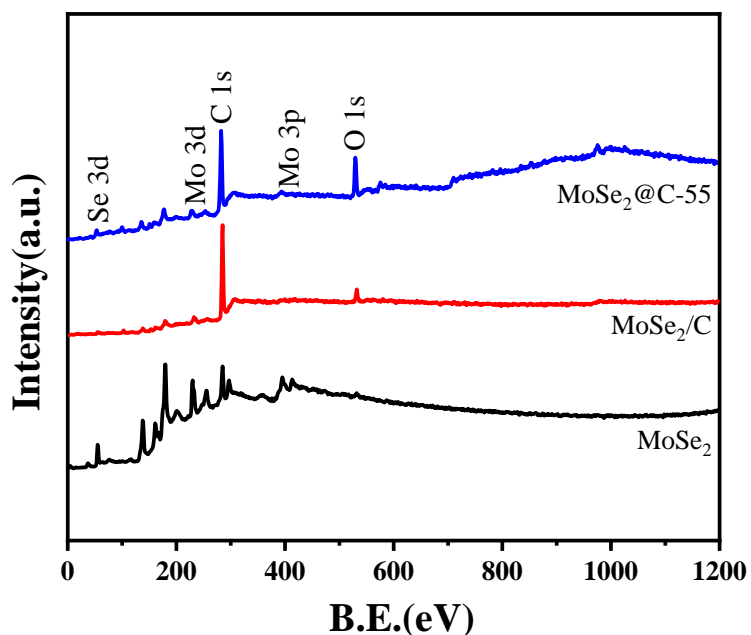

**Figure S3.** Survey XPS spectra of MoSe<sub>2</sub>, MoSe<sub>2</sub>/C and MoSe<sub>2</sub>@C catalysts

**Table S1.** The valence state and distribution of Mo element on the surface of MoSe<sub>2</sub>, MoSe<sub>2</sub>/C and MoSe<sub>2</sub>@C catalysts

| Catalysts               | Mo <sup>2+</sup>  | Mo <sup>2+</sup>  | Mo <sup>4+</sup>  | Mo <sup>4+</sup>  | Mo <sup>6+</sup>  | Mo <sup>6+</sup>  |
|-------------------------|-------------------|-------------------|-------------------|-------------------|-------------------|-------------------|
|                         | 3d <sub>5/2</sub> | 3d <sub>3/2</sub> | 3d <sub>5/2</sub> | 3d <sub>3/2</sub> | 3d <sub>5/2</sub> | 3d <sub>3/2</sub> |
| MoSe <sub>2</sub>       | -                 | -                 | 229.3             | 232.3             | -                 | -                 |
| MoSe <sub>2</sub> /C    |                   |                   | 229.2             | 232.3             | 232.7             | 235.7             |
| MoSe <sub>2</sub> @C-55 | 228.6             | 231.6             | 229.1             | 232.1             | 232.5             | 235.4             |

**Table S2.** The valence state and distribution of Se element on the surface of MoSe<sub>2</sub>, MoSe<sub>2</sub>/C and MoSe<sub>2</sub>@C catalysts.

| Catalysts               | Se <sup>2-</sup> 3d <sub>5/2</sub> | Se <sup>2-</sup> 3d <sub>3/2</sub> | SeO <sub>x</sub> |
|-------------------------|------------------------------------|------------------------------------|------------------|
| MoSe <sub>2</sub>       | 54.8                               | 55.7                               | -                |
| MoSe <sub>2</sub> /C    | 54.8                               | 55.8                               | 59.1             |
| MoSe <sub>2</sub> @C-55 | 54.7                               | 55.8                               | -                |

**Table S3.** The valence state and distribution of C element on the surface of MoSe<sub>2</sub>, MoSe<sub>2</sub>/C and MoSe<sub>2</sub>@C catalysts.

| Catalysts               | C-Mo  | C-C   | C-O   |
|-------------------------|-------|-------|-------|
| MoSe <sub>2</sub>       | -     | 284.8 | 286.1 |
| MoSe <sub>2</sub> /C    | -     | 284.8 | 286.1 |
| MoSe <sub>2</sub> @C-55 | 282.6 | 284.8 | 286.1 |

**Table S4.** The valence state and distribution of O element on the surface of MoSe<sub>2</sub>, MoSe<sub>2</sub>/C and MoSe<sub>2</sub>@C catalysts

| Catalysts               | Lattice oxygen | Deficient oxygen | Adsorbed oxygen |
|-------------------------|----------------|------------------|-----------------|
| MoSe <sub>2</sub>       | 530.4(23.3%)   | 531.8(34.6%)     | 532.8(42.1%)    |
| MoSe <sub>2</sub> /C    | 530.4(16.4%)   | 531.8(37.4%)     | 532.8(46.2%)    |
| MoSe <sub>2</sub> @C-55 | 530.4(15.1%)   | 531.8(59.6%)     | 532.8(25.3%)    |

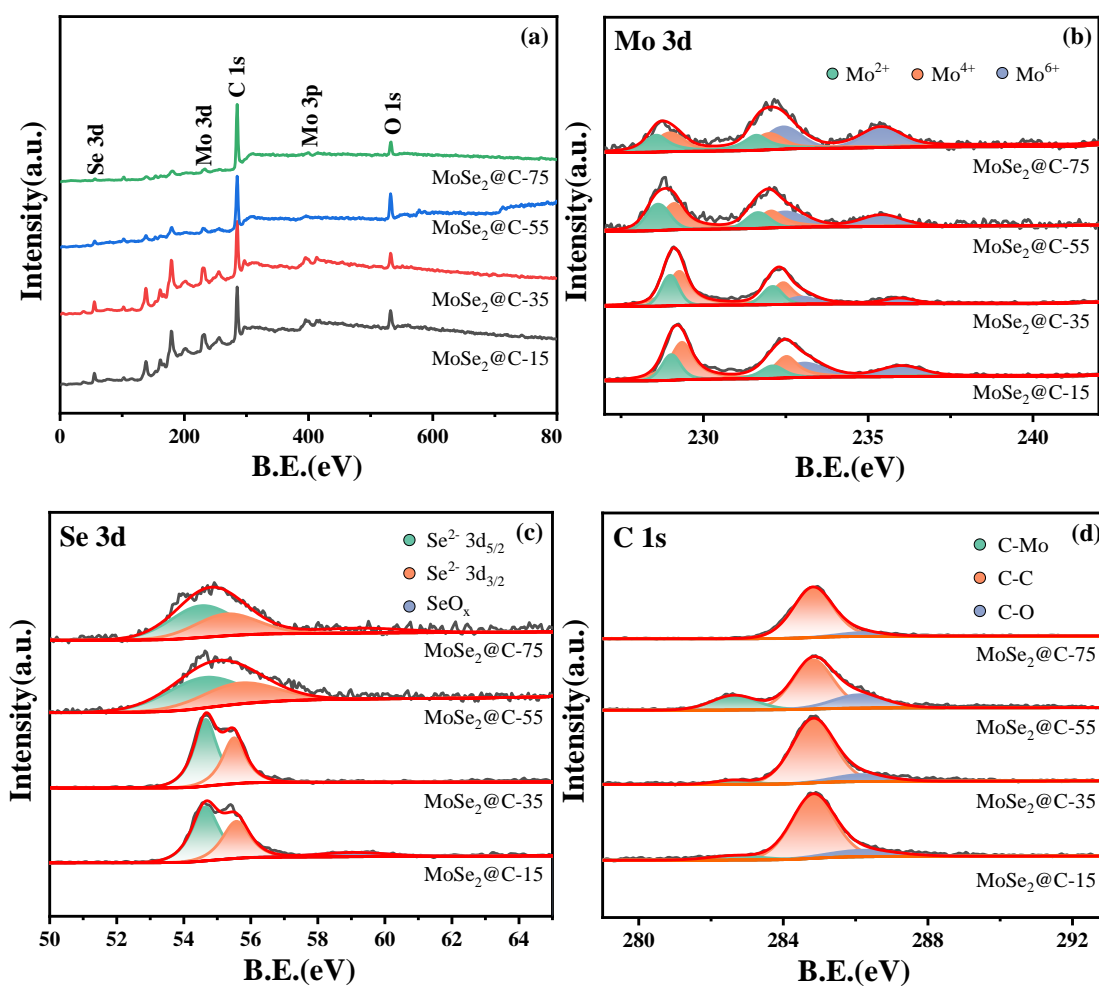

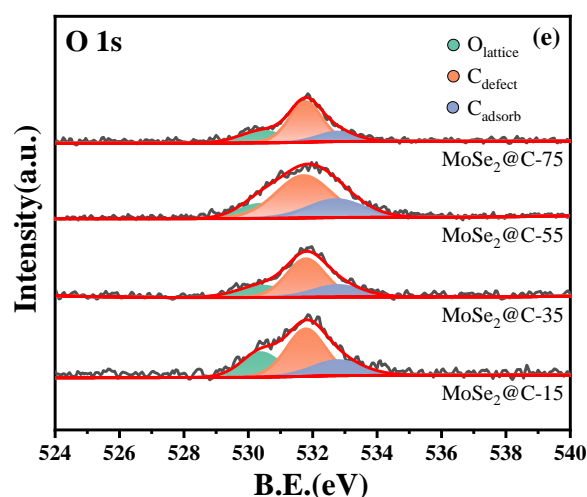

**Figure S4.** XPS spectra of MoSe<sub>2</sub>@C-x catalysts prepared with different C/Mo ratios: (a) survey spectrum; (b) Mo 3d; (c) Se 3d; (d) C 1s; (e) O 1s.

**Table S5.** The valence state and distribution of Mo element on the surface of MoSe<sub>2</sub>@C-x

| Catalysts               | Mo 3d <sub>3/2</sub> (eV) |                  |                  |                                     |
|-------------------------|---------------------------|------------------|------------------|-------------------------------------|
|                         | Mo <sup>2+</sup>          | Mo <sup>4+</sup> | Mo <sup>6+</sup> | Mo <sup>2+</sup> / Mo <sup>4+</sup> |
| MoSe <sub>2</sub> @C-15 | 232.1(26.6%)              | 232.5 (48.4%)    | 236.0 (25.0%)    | 0.55                                |
| MoSe <sub>2</sub> @C-35 | 232.0 (33.2%)             | 232.4 (56.3%)    | 235.9 (17.5%)    | 0.59                                |
| MoSe <sub>2</sub> @C-55 | 231.6 (28.9%)             | 232.1(43.6%)     | 235.3(28.9%)     | 0.66                                |
| MoSe <sub>2</sub> @C-75 | 231.6 (27.4%)             | 232.1(37.5%)     | 235.4(35.2%)     | 0.73                                |

**Table S6.** The valence state and distribution of O element on the surface of MoSe<sub>2</sub>@C-x

| Catalysts               | lattice oxygen | deficient oxygen | adsorbed oxygen |
|-------------------------|----------------|------------------|-----------------|
| MoSe <sub>2</sub> @C-15 | 530.4(26.8%)   | 531.8(51.8%)     | 532.8(21.4%)    |
| MoSe <sub>2</sub> @C-35 | 530.4(21.2%)   | 531.8(57.1%)     | 532.8(21.7%)    |
| MoSe <sub>2</sub> @C-55 | 530.4(15.1%)   | 531.8(59.6%)     | 532.8(25.3%)    |
| MoSe <sub>2</sub> @C-75 | 530.4(23.3%)   | 531.8(60.1%)     | 532.8(16.6%)    |

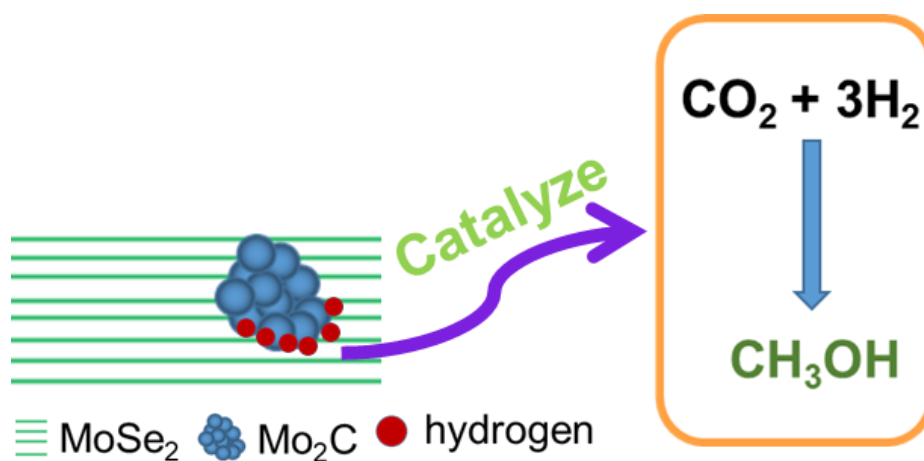

**Figure S5.** Activating H<sub>2</sub> on the MoSe<sub>2</sub>-Mo<sub>2</sub>C heterojunction

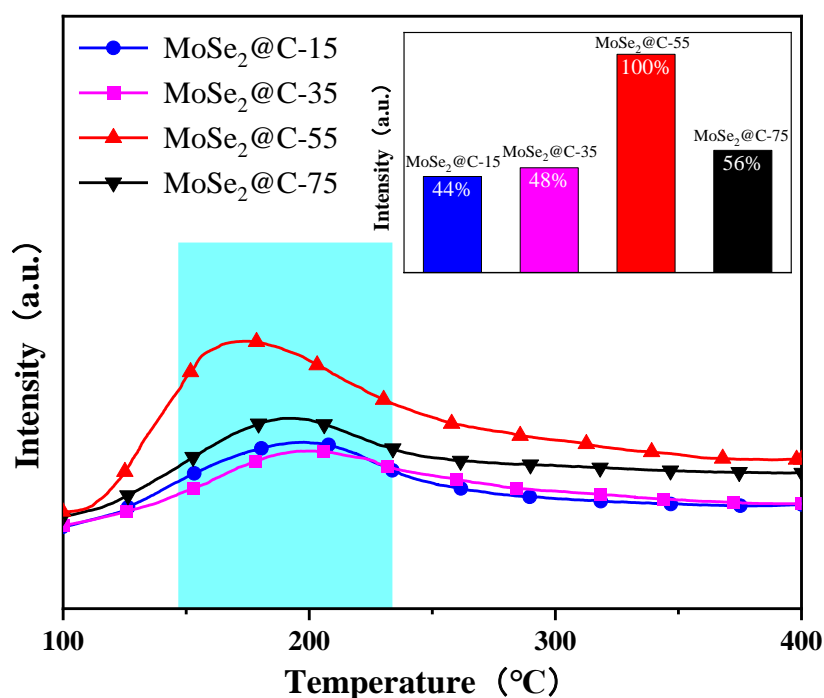

**Figure S6.** CO<sub>2</sub>-TPD of MoSe<sub>2</sub>@C-x with different C/Mo ratios

**Table S7.** Comparison of the MoSe<sub>2</sub>@C-55 with the reported catalysts in the CO<sub>2</sub> hydrogenation to methanol.

| Catalyst                              | Reaction conditions                                                                                          | Conv. (%) | Sel. (%) | Ref. |
|---------------------------------------|--------------------------------------------------------------------------------------------------------------|-----------|----------|------|
| CNTs@MoS <sub>2</sub>                 | 260 °C, 5 MPa, 24000 ml·g <sub>cat</sub> <sup>-1</sup> ·h <sup>-1</sup> , H <sub>2</sub> /CO <sub>2</sub> =3 | 7.5       | 78.1     | [73] |
| Cu/MoS <sub>2</sub> @SiO <sub>2</sub> | 260 °C, 5 MPa, 24000 ml·g <sub>cat</sub> <sup>-1</sup> ·h <sup>-1</sup> , H <sub>2</sub> /CO <sub>2</sub> =4 | 9.0       | 72.5     | [74] |
| MoS <sub>2</sub> /Ni <sub>0.2</sub>   | 260 °C, 5 MPa, 12000 ml·g <sub>cat</sub> <sup>-1</sup> ·h <sup>-1</sup> , H <sub>2</sub> /CO <sub>2</sub> =3 | 1.0       | 83.7     | [75] |
| 5%Cu-MoS <sub>2</sub>                 | 220 °C, 5 MPa, 12000 ml·g <sub>cat</sub> <sup>-1</sup> ·h <sup>-1</sup> , H <sub>2</sub> /CO <sub>2</sub> =4 | 5.4       | 86.0     | [60] |

|                                                         |                                                                                                              |      |      |           |
|---------------------------------------------------------|--------------------------------------------------------------------------------------------------------------|------|------|-----------|
| <i>h</i> -MoS <sub>2</sub> /ZnS                         | 260 °C, 5 MPa, 15000 ml·g <sub>cat</sub> <sup>-1</sup> ·h <sup>-1</sup> , H <sub>2</sub> /CO <sub>2</sub> =4 | 9.0  | 67.3 | [69]      |
| Cu/In <sub>2</sub> O <sub>3</sub>                       | 300 °C, 5 MPa, 6000 ml·g <sub>cat</sub> <sup>-1</sup> ·h <sup>-1</sup> , H <sub>2</sub> /CO <sub>2</sub> =4  | 18.4 | 44.4 | [76]      |
| Cu/ZnO/Al <sub>2</sub> O <sub>3</sub> /ZrO <sub>2</sub> | 250 °C, 5 MPa, 20000 ml·g <sub>cat</sub> <sup>-1</sup> ·h <sup>-1</sup> , H <sub>2</sub> /CO <sub>2</sub> =3 | 20.2 | 44.9 | [77]      |
| MoSe <sub>2</sub> @C-55                                 | 180 °C, 3 MPa, 3000 ml·g <sub>cat</sub> <sup>-1</sup> ·h <sup>-1</sup> , H <sub>2</sub> /CO <sub>2</sub> =3  | 9.7  | 93.7 | This work |

---
